# Supplementary material for: BMP8B Increases Brown Adipose Tissue Thermogenesis through Both Central and Peripheral Actions
Source: PubMed Central journal article supplement (PMC3383997; doi:10.1016/j.cell.2012.02.066), 2012-05-11
Supplement: mmc1.pdf [file mmc1.pdf]

Table S1. Temperature-Dependant Ratios of *Bmp8b*<sup>-/-</sup> Pups, Related to Figure 2

| 20°C     |                   |                 | 23°C     |                    |                 |
|----------|-------------------|-----------------|----------|--------------------|-----------------|
| Genotype | <i>Observed</i>   | <i>Expected</i> | Genotype | <i>Observed</i>    | <i>Expected</i> |
| (+/+)    | 142 (30%)         | 120             | (+/+)    | 283 (28%)          | 252             |
| (+/-)    | 283 (59%)         | 239             | (+/-)    | 529 (53%)          | 502             |
| (-/-)    | 54 ( <b>11%</b> ) | 120             | (-/-)    | 194 ( <b>19%</b> ) | 252             |
| Total    | 479               | 479             | Total    | 1006               | 1006            |

Chi<sup>2</sup> = 48.4 P < 0.0001

Chi<sup>2</sup> = 18.6 P < 0.0001

Total numbers of pups of different genotypes born over the course of two years when ambient housing temperature was kept at the indicated temperature. Breeding was set up using mice heterozygous for the *Bmp8b* deletion. Percentages for that year indicated in brackets.

Table S2. Serum Biochemistry of *Bmp8b*<sup>-/-</sup> Mice, Related to Figure 2

| Marker         | Units  | Chow                        |                             | HFD                         |                             | Sig. |
|----------------|--------|-----------------------------|-----------------------------|-----------------------------|-----------------------------|------|
|                |        | <i>Bmp8b</i> <sup>+/+</sup> | <i>Bmp8b</i> <sup>-/-</sup> | <i>Bmp8b</i> <sup>+/+</sup> | <i>Bmp8b</i> <sup>-/-</sup> |      |
| Cholesterol    | mmol/L | 1.85 (+/-) 0.13             | 1.79 (+/-) 0.15             | 3.83 (+/-) 0.14             | 4.22 (+/-) 0.20             | b    |
| Triglycerides  | mmol/L | 0.94 (+/-) 0.08             | 0.92 (+/-) 0.07             | 0.72 (+/-) 0.07             | 0.60 (+/-) 0.04             | b    |
| HDL            | mmol/L | 0.94 (+/-) 0.13             | 0.83 (+/-) 0.17             | 1.55 (+/-) 0.06             | 1.54 (+/-) 0.11             | b    |
| LDL            | mmol/L | 0.50 (+/-) 0.10             | 0.53 (+/-) 0.16             | 1.96 (+/-) 0.13             | 2.40 (+/-) 0.18             | b    |
| Glucose        | mmol/L | 11.29 (+/-) 0.59            | 10.68 (+/-) 0.46            | 12.74 (+/-) 0.45            | 13.20 (+/-) 0.59            |      |
| NEFA           | μmol/L | 1151(+/-) 94                | 1238 (+/-) 103              | 1048 (+/-) 104              | 949 (+/-) 104               |      |
| Insulin        | μg/L   | 0.47 (+/-) 0.13             | 0.54 (+/-) 0.10             | 1.23(+/-) 0.24              | 1.78 (+/-) 0.30             | b    |
| Leptin         | pg/ml  | 2813 (+/-) 399              | 4518 (+/-) 973              | 51029 (+/-) 10954           | 79060 (+/-) 9890            | b    |
| Corticosterone | ng/ml  | 112.3 (+/-) 31.6            | 68.7 (+/-) 21.2             | 140.8 (+/-) 28.9            | 153.5 (+/-) 14.8            |      |
| 3-OH Butyrate  | μmol/L | 278.4 (+/-) 65.6            | 349.1 (+/-) 58.8            | 355.7 (+/-) 81.1            | 431.8 (+/-) 47.2            |      |
| T4             | nmol/L | 61.35 (+/-) 6.09            | 49.03 (+/-) 8.23            | 61.50 (+/-) 2.55            | 54.92 (+/-) 3.29            |      |

Serum biochemistry analysis of levels of a range of metabolically relevant molecules in WT and KO mice fed standard chow and HFD. N = 7 per group, aged 20 weeks. Annotation indicates significant effect of a = genotype, b = diet, c = significant genotype-diet interaction where p < 0.05 using 2-Way ANOVA.

Table S3. List of Oligonucleotide Sequences, Related to Experimental Procedures

| Gene                  | Forward Primer                  | Reverse Primer           | Probe/SYBR green                    |
|-----------------------|---------------------------------|--------------------------|-------------------------------------|
| MOUSE                 |                                 |                          |                                     |
| <i>18s</i>            | CGGCTACCACATCCAAGGAA            | GTCGGAATTACCGCGGCT       | GAGGGCAAGTCTGGTGCCAG                |
| <i>Actb</i>           | GCTCTGGCTCCTAGCACCAT            | GCCACCGATCCACACAGAGT     | ATCAAGATCATTGCTCCTCCTGAGCGC         |
| <i>Adra2a</i>         | CGCAGGCCATCGAGTACAA             | GGTGACAATGATGGCCTTGAT    | SYBR                                |
| <i>Adrb3</i>          | CGAGCCAGCCCTGTTGA               | GGACGCGCACCTTCATAGC      | SYBR                                |
| <i>Arbp</i><br>(36B4) | TCTCCAGAGGCACCATTGAAA           | CTCGCTGGCTCCCACCTT       | TCTGAGTGATGTGCAGCTGATAAAGACTG<br>GA |
| <i>B2m</i>            | GGTCTTTCTCTGGTGCCTTGTC          | GTATGTTCCGGCTTCCCATTTC   | SYBR                                |
| <i>Bmp2</i>           | AACACCGTGCCGAGCTT               | GCCGTTTTCCCACTCATCTC     | SYBR                                |
| <i>Bmp4</i>           | GCCATTCCGTAGTGCCATT             | TTGCTGGAAAGGCTCAGAGA     | SYBR                                |
| <i>Bmp5</i>           | CAAGAAGCACGAACTCTATGTGAGT       | CCCTTCTGGTCTATGATCCA     | SYBR                                |
| <i>Bmp6</i>           | CGCAGGACAGCGCTTTC               | GTCGTACTCCACCAGGTTACA    | SYBR                                |
| <i>Bmp7</i>           | TGGATGGGCAGAGCATCAA             | GGTCCATGCCGTCCTCAATC     | SYBR                                |
| <i>Bmp8a</i>          | AACCATGCCATCTTGCAGTCT           | CAGAGGTGGCACTCAGTTTGG    | TGTCCCAAGGCATGCTGTGCA               |
| <i>Bmp8b</i>          | TCCACCAACCACGCCACTAT            | CAGTAGGCACACAGCACACCT    | CAGGCCCTGGTACATCTGATGAAGCC          |
| <i>Cd36</i>           | GCCAAGCTATTGCGACATGA            | TCTCAATGTCCGAGACTTTTCAAC | CACAGACGCGCCTCCTTCCACCT             |
| <i>Cpt1b</i>          | GCGTGCCAGCCACAATTC              | TCCATGCGGTAATATGCTTCAT   | CCGGTACTTGGATTCTGTGCGGCC            |
| <i>Dio2</i>           | TGCGCTGTGTCTGGAACAG             | CTGGAATTTGGGAGCATCTTCA   | SYBR                                |
| <i>Elovl3</i>         | ATGAATTTCTCACGCGGGTTA           | GAGCTTACCCAGTACTCCTCCAAA | SYBR                                |
| <i>Fas</i>            | GCCCAGACAGAGAAGAGGCA            | CTGACTCGGGCAACTCCC       | GGAGGAGGTGGTGATAGCCGGTATGTC         |
| <i>Hsl</i>            | GGAGCACTACAACGCAACGA            | TCGGCCACCGTAAAGAG        | CAGGCCCTCAGTGTGACCCGCGATT           |
| <i>Lcad</i>           | GCATGAAACCAAACTCTGGA            | TGTTTTGTAATTCAGATGCCAGT  | TCCGGTTCTGCTTCCATGGCAAAA            |
| <i>Pgc1a</i>          | AACCACACCCACAGGATCAGA           | CTCTTCGCTTTATTGCTCCATGA  | CAAACCTGCCATTGTTAAGACCGAGAA         |
| <i>Pgc1b</i>          | GGCCTTGTGTCAAGGTGGAT            | GGTGCTTATGCAGTTCCTGACA   | AGACCCACACTGCGGGCTC                 |
| <i>Ppara</i>          | CCTCAGGGTACCACTAGGGAGT          | GCCCCAATAGTTCGCCGAAA     | CACGCATGTGAAGGCTGTAAGCGCTT          |
| <i>Pparg1</i>         | TTTTAAAACAAGACTACCCCTTACTGAAATT | AGAGGTCCACAGAGCTGATTCC   | AGAGATGCCATTCTGGCCCCACCAACTT        |
| <i>Pparg2</i>         | GATGCACTGCCTATGAGCACTT          | AGAGGTCCACAGAGCTGATTCC   | AGAGATGCCATTCTGGCCCCACCAACTT        |
| <i>Prkaca</i>         | TCCTTTGGGCGAGTGATGC             | GCGAAGAAGGGTGGGTAAC      | SYBR                                |
| <i>Prkar1a</i>        | CTTTAGCCAAGGCCATCGAA            | AATGTCACTTCTCTCGTTATCAT  | SYBR                                |
| <i>Prkar2a</i>        | AGAGTGACTCGGACTCGGAAG           | GGTCAGTATGACAACCGTGCC    | SYBR                                |
| <i>Srebp1c</i>        | GCCATGGATTGCACATTTGA            | GGCCCGGGAAGTCACTG        | GACATGCTCCAGCTCATCAACAACCAAG        |
| <i>Ucp1</i>           | CCCGCTGGACACTGCC                | ACCTAATGGTACTGGAAGCCTGG  | AAGTCCGCCTTCAGATCCAAGGTGAAG         |
| RAT                   |                                 |                          |                                     |
| <i>18s</i>            | CGGCTACCACATCCAAGGAA            | GTCGGAATTACCGCGGCT       | GAGGGCAAGTCTGGTGCCAG                |
| <i>Adra2a</i>         | GGTGGTGATCGGCGTGTT              | CGACGGCTATGAGCGTGATG     | SYBR                                |
| <i>Adrb3</i>          | CCTTCCCAGCTAGCCCTGTT            | TGCTAGATCTCCATGGTCTTCA   | SYBR                                |
| <i>Dio2</i>           | ACGGAGGCAAACTGGTCCAT            | CACTTAGTTCCTGTAAGCGTAGTC | SYBR                                |
| <i>Hprt</i>           | AGCCGACCGGTTCTGTGCAT            | GGTCATAACCTGGTTCATCATCAC | SYBR                                |
| <i>Pgc1α</i>          | CGATCACCATATCCAGGTCAAG          | CGATGTGTGCGGTGTCTGTAGT   | SYBR                                |
| <i>Ucp1</i>           | CAATGACCATGTACACCAAGGAA         | GATCCGAGTCGCGAAAAGAA     | SYBR                                |

Comprehensive list of primers and probes used for TaqMan analysis of gene expression.

“SYBR” indicates no probe was required as SYBR Green reagent was used to quantify amplicon levels.

Table S4. Antisense Oligonucleotides for In Situ Hybridisation Analysis, Related to Experimental Procedures

| <b>mRNA</b>  | <b>Genbank accession number</b> | <b>Sequence</b>                                            |
|--------------|---------------------------------|------------------------------------------------------------|
| <b>AgRP</b>  | NM_007427                       | 5' - CGACGCGGAGAACGAGACTCGCGTTCTGTGGATCTAGCACCTCTGCC - 3'  |
| <b>Bmp8b</b> | NM_007559                       | 5' - GAAATGGCACTCAGCTCAGTAGGCACAGCACACCTTGGG - 3'          |
| <b>CART</b>  | NM_013732                       | 5' - ACAGTCACACAGCTTCCCGATCCTGGCCCCTTTC - 3'               |
| <b>NPY</b>   | AF273768                        | 5' - GGGCGTTTTCTGTGCTTTCCTTCATTAAGAGGTCTG - 3'             |
| <b>POMC</b>  | NM_008895                       | 5' - CTTGATGATGGCGTTCTTGAAGAGCGTCACCAGGGGCGTCTGGCTCTT - 3' |

List of all hybridisation probes with accession numbers of the mRNA template used to generate them.
